# Supplementary material for: Enteric Species F Human Adenoviruses use Laminin-Binding Integrins as Co-Receptors for Infection of Ht-29 Cells
Source: PubMed Central journal article supplement (PMC6030200; doi:10.1038/s41598-018-28255-7), 2018-07-03
Supplement: 41598_2018_28255_MOESM1_ESM.pdf [file 41598_2018_28255_MOESM1_ESM.pdf]

**ENTERIC SPECIES F HUMAN ADENOVIRUSES USE LAMININ-BINDING  
INTEGRINS AS CO-RECEPTORS FOR INFECTION OF HT-29 CELLS**

Anandi Rajan<sup>a</sup>, B. David Persson<sup>a+</sup>, Lars Frångsmyr<sup>a+</sup>, Annelie Olofsson<sup>b</sup>, Linda Sandblad<sup>b</sup>, Jyrki Heino<sup>c</sup>, Yoshikazu Takada<sup>d</sup>, A. Paul Mould<sup>e</sup>, Lynn M Schnapp<sup>f</sup>, Jason Gall<sup>g</sup>, Niklas Arnberg<sup>a\*</sup>

<sup>a</sup>Department of Clinical Microbiology/ Division of Virology and the Laboratory for Molecular Infection Medicine Sweden, Umeå University, Sweden;

<sup>b</sup>Department of Molecular Biology, Umeå University, Sweden;

<sup>c</sup>Department of Biochemistry, University of Turku, Finland;

<sup>d</sup>Department of Dermatology, Biochemistry and Molecular Medicine, UC Davis School of Medicine, California, USA;

<sup>e</sup>Biomolecular Analysis Core Facility, Faculty of Biology, Medicine and Health, University of Manchester, United Kingdom;

<sup>f</sup>Division of Pulmonary, Critical Care, Allergy and Sleep Medicine, Medical University of South Carolina, Charleston, USA;

<sup>g</sup>Vaccine Research Center (VRC), NIAID, NIH, Bethesda, USA

Running Head: Enteric HAdVs and laminin-binding integrins

\*Address correspondence to Niklas Arnberg, [niklas.arnberg@umu.se](mailto:niklas.arnberg@umu.se)

+ These authors contributed equally to this work.

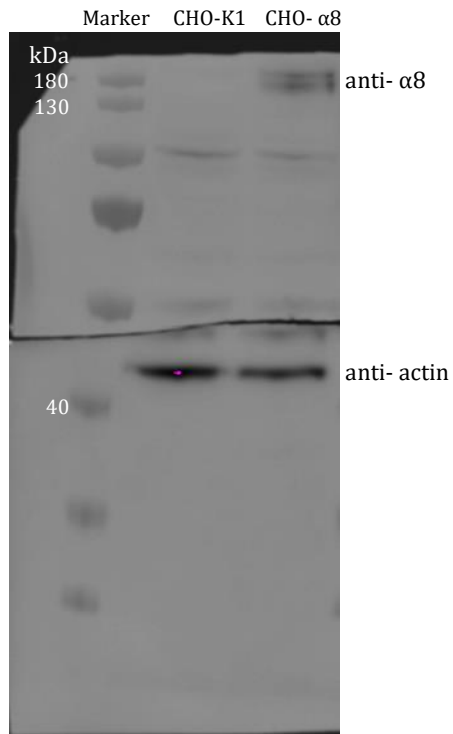

Figure S1: **Expression of human  $\alpha 8$  integrin.** Full length blot of analysis of  $\alpha 8$  integrin in transfected CHO cells and control CHO-K1 cells.

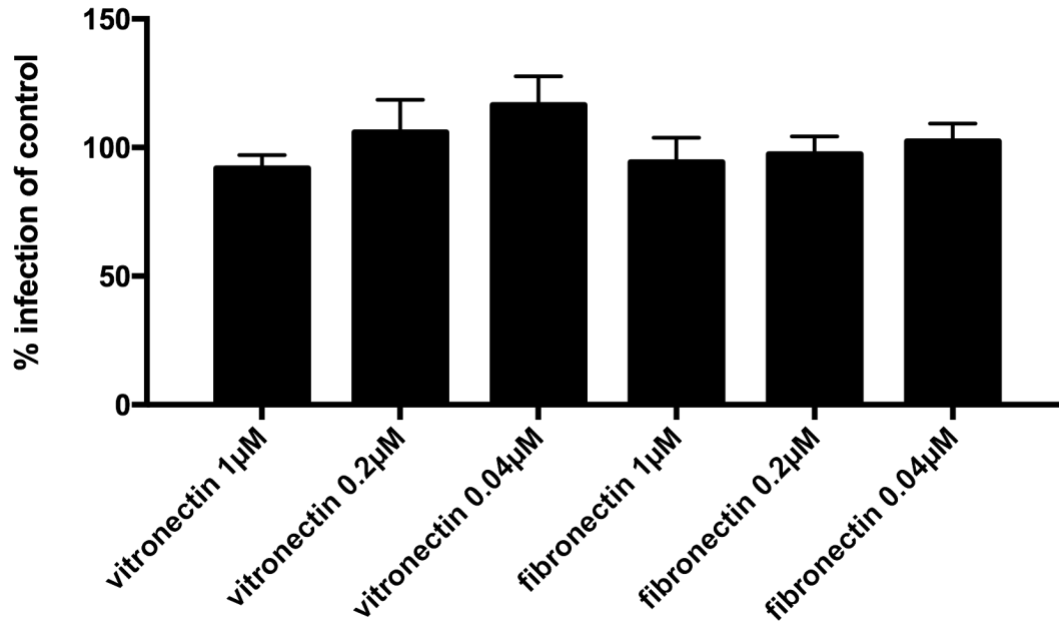

Figure S2: **HAdV-41 infection of HT-29 cells in presence of soluble vitronectin and fibronectin.** HAdV-41 infection of HT-29 cells in the presence of different concentrations of vitronectin and fibronectin. The data is represented as % infection of untreated cells. Experiments were performed twice with duplicate samples in each experiment. Error bars represent mean  $\pm$  SEM.
